# Supplementary material
Source: Springer Nature journal article supplement (https://www.springermedizin.de/resource/supplementary/12936_2014_3203_MOESM2_ESM.pdf/9545328)

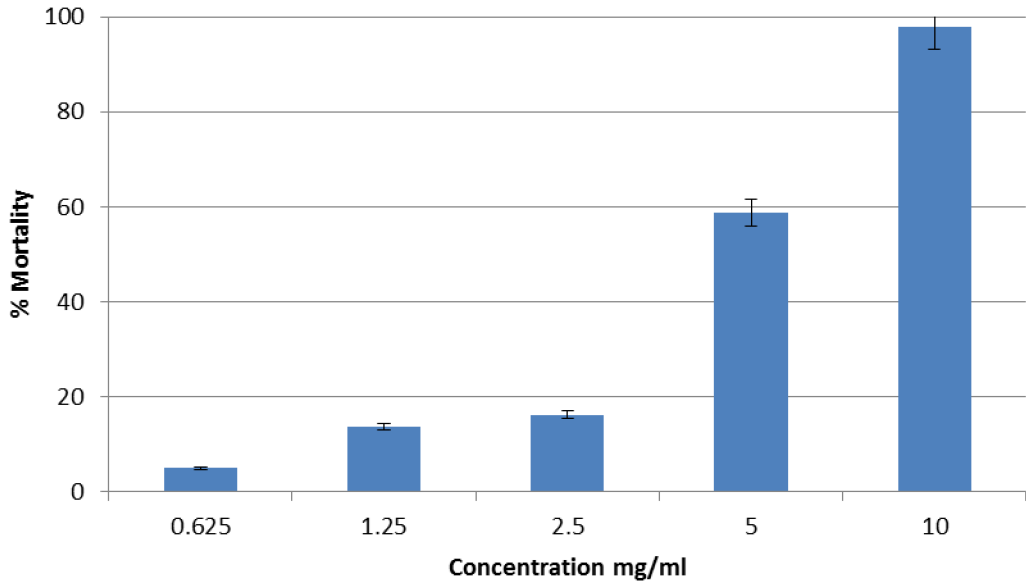

Supplement: MOESM2 [file 9545328]
